# Supplementary material for: The Caenorhabditis elegans Werner Syndrome Protein Functions Upstream of ATR and ATM in Response to DNA Replication Inhibition and Double-Strand DNA Breaks
Source: PubMed Central journal article supplement (PMC2791846; doi:10.1371/journal.pgen.1000801), 2010-01-08

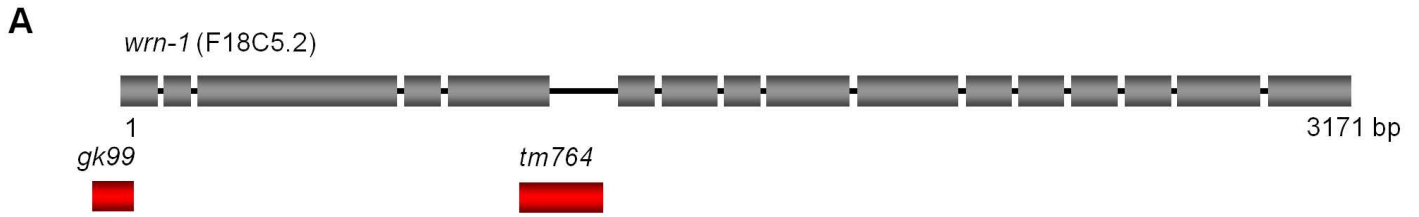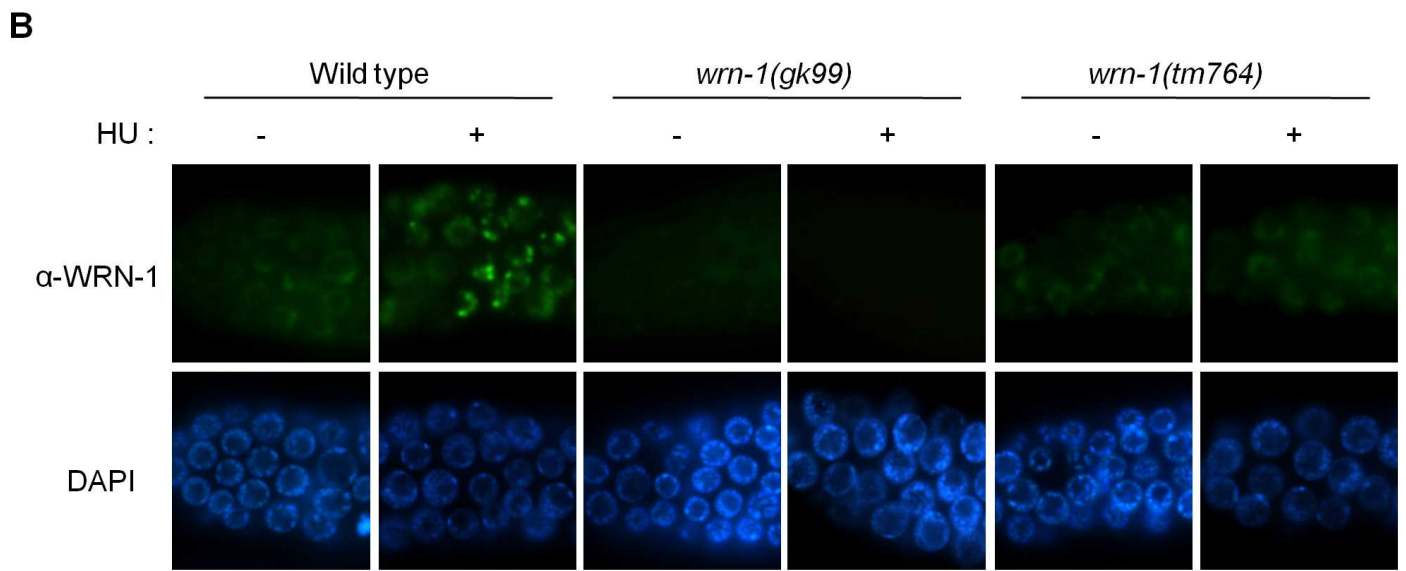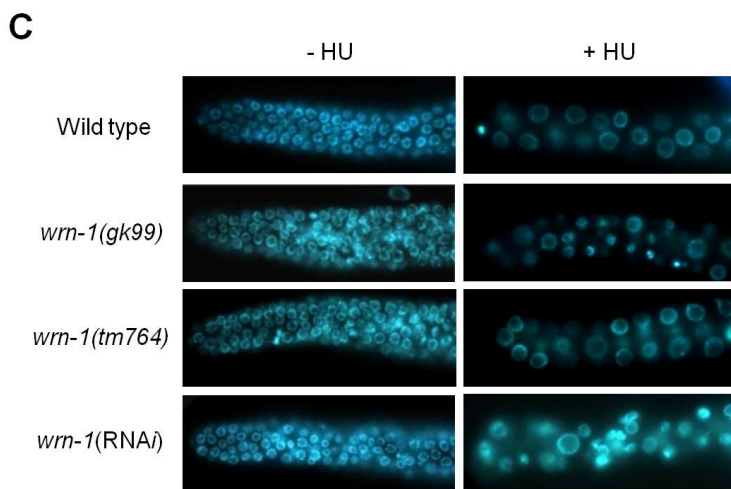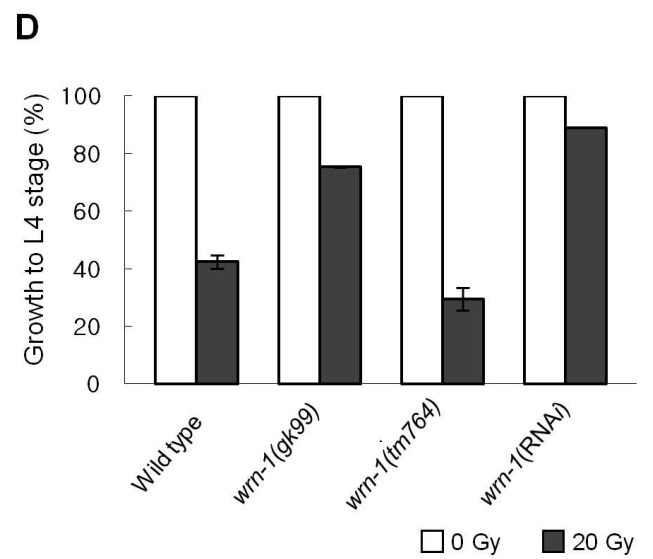

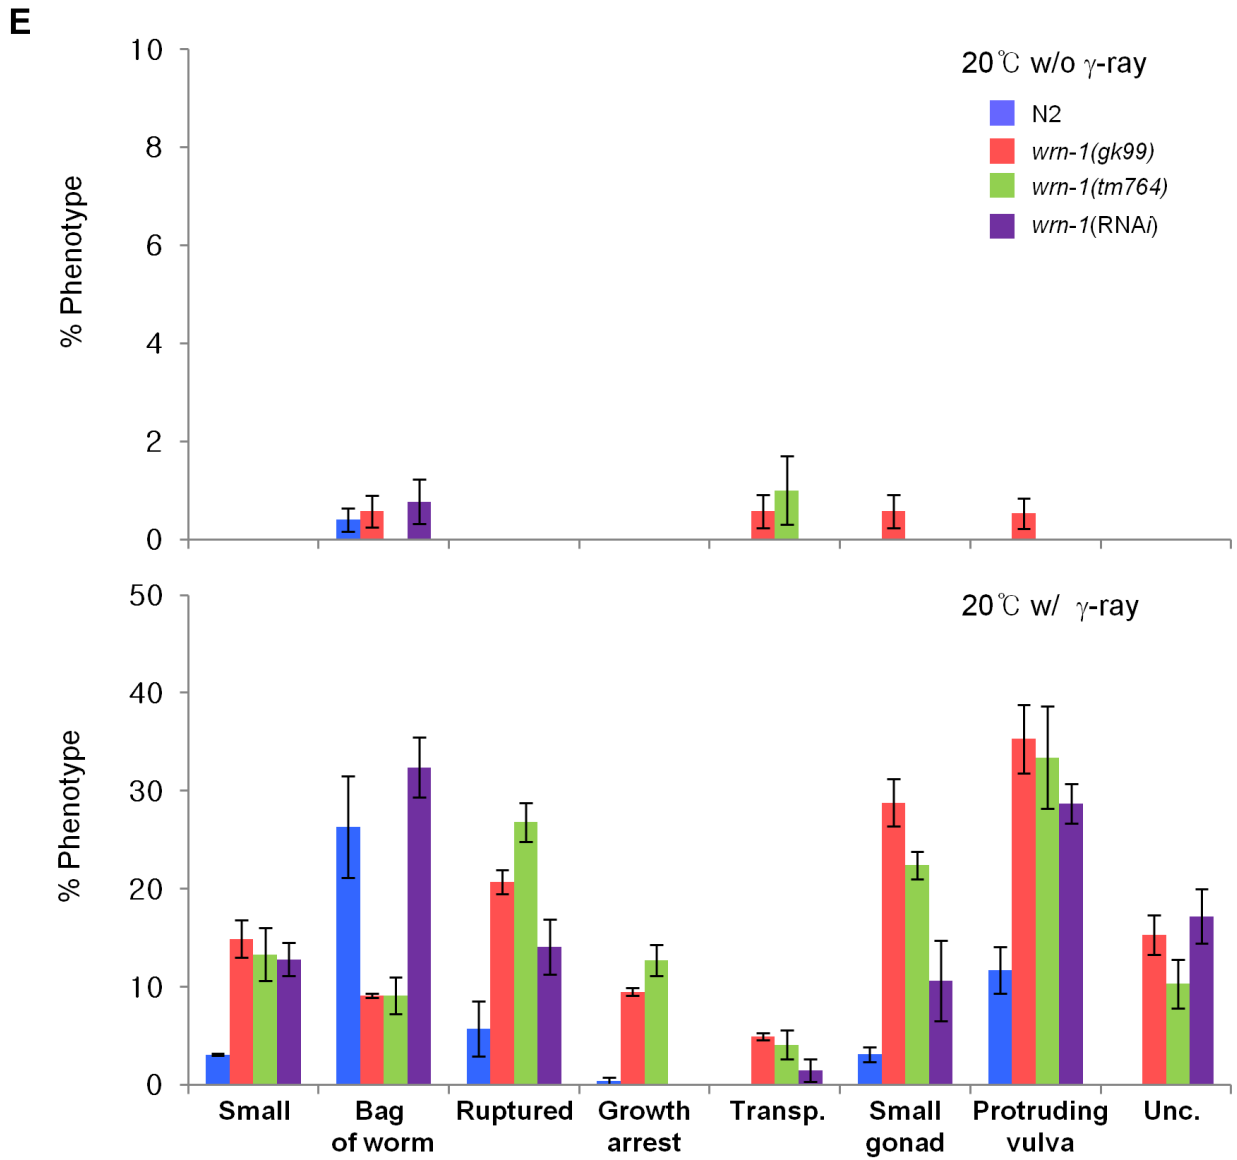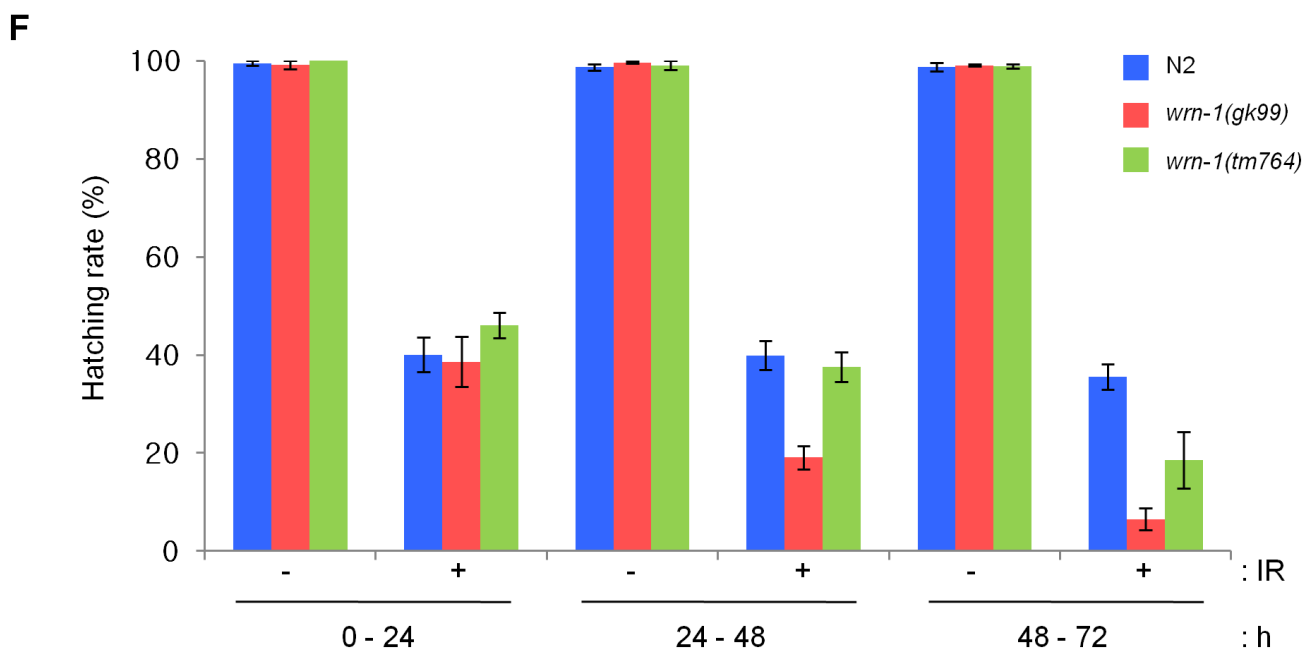

Supplement: pgen.1000801.s001.pdf [file pgen.1000801.s001.pdf]
